# Supplementary material
Source: HighWire-hosted journal article supplement (https://mentalhealth.bmj.com/content/26/1/e300697)
Supplement: inline-supplementary-material-2 [file inline-supplementary-material-2.pdf]

**Effectiveness of a mental health stepped-care programme for healthcare workers with psychological distress during the COVID-19 pandemic: a multi-centre randomised controlled trial**

Appendix

**Table of contents**

Secondary analyses (pre-specified), p. 3  
Sensitivity analyses (exploratory), p. 12

**List of abbreviations**

|         |                                                             |
|---------|-------------------------------------------------------------|
| CI      | confidence interval                                         |
| DWM     | Doing What Matters in times of stress                       |
| GAD-7   | Generalised Anxiety Disorder Questionnaire                  |
| HCWs    | healthcare workers                                          |
| ITT     | intention-to-treat                                          |
| NNT     | number needed to treat                                      |
| OR      | odds ratio                                                  |
| PCL-5   | PTSD checklist for the DSM-5                                |
| PHQ-9   | Patient Health Questionnaire                                |
| PHQ-ADS | Patient Health Questionnaire – Anxiety and Depression Scale |
| PM+     | Problem Management Plus                                     |
| PTSD    | Posttraumatic stress disorder                               |
| SES     | standardised effect size                                    |

### Secondary analyses (pre-specified)

Results of the three pre-specified three secondary analyses confirmed our main models. The ITT analyses using fully adjusted models and secondary outcomes are reported in Table 2 and Figure 3 of the manuscript, along with the main analysis, to ease readability and interpretability. The results of the subgroup analyses are presented below.

#### Female HCWs

This analysis includes 101 participants on the intervention arm and 99 participants on the control arm (n = 200, 86%).

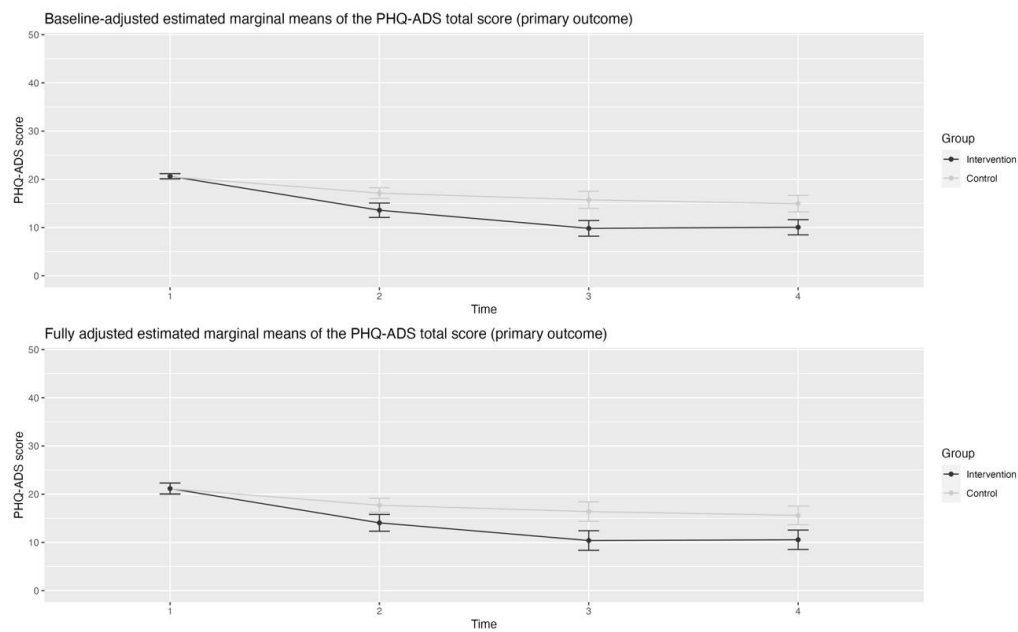

Appendix Figure 1. Estimated marginal means of the PHQ-ADS (female HCWs)

Appendix Table 1. Estimated marginal means and 95 percent CIs (female HCWs)

|                                                                                                                                                                                                                                                             |                     | Baseline-adjusted models <sup>‡</sup> |                   |                 | Fully adjusted models <sup>†</sup> |                   |                 |
|-------------------------------------------------------------------------------------------------------------------------------------------------------------------------------------------------------------------------------------------------------------|---------------------|---------------------------------------|-------------------|-----------------|------------------------------------|-------------------|-----------------|
|                                                                                                                                                                                                                                                             |                     | Control                               | Intervention      | Difference      | Control                            | Intervention      | Difference      |
| PHQ-ADS <sup>1</sup>                                                                                                                                                                                                                                        | Week 21 (follow-up) | 15 (13.2, 16.7)                       | 10.1 (8.5, 11.6)  | 4.9 (2.6, 7.2)  | 15.6 (13.7, 17.5)                  | 10.5 (8.5, 12.6)  | 5.1 (2.7, 7.4)  |
|                                                                                                                                                                                                                                                             | Week 13 (post PM+)  | 15.7 (14, 17.5)                       | 9.8 (8.2, 11.5)   | 5.9 (3.5, 8.3)  | 16.4 (14.4, 18.4)                  | 10.4 (8.4, 12.4)  | 6 (3.6, 8.5)    |
|                                                                                                                                                                                                                                                             | Week 7 (post DWM)   | 17.1 (16, 18.2)                       | 13.6 (12.1, 15.1) | 3.6 (1.7, 5.4)  | 17.7 (16.2, 19.2)                  | 14.1 (12.3, 15.8) | 3.6 (1.8, 5.5)  |
| PHQ-9 <sup>2</sup>                                                                                                                                                                                                                                          | Week 21 (follow-up) | 7.6 (6.7, 8.5)                        | 4.9 (4, 5.8)      | 2.7 (1.4, 4)    | 8.1 (7, 9.1)                       | 5.3 (4.2, 6.3)    | 2.8 (1.5, 4.1)  |
|                                                                                                                                                                                                                                                             | Week 13 (post PM+)  | 7.8 (6.9, 8.8)                        | 4.6 (3.8, 5.5)    | 3.2 (1.9, 4.5)  | 8.3 (7.2, 9.4)                     | 5.1 (4, 6.1)      | 3.2 (1.9, 4.6)  |
|                                                                                                                                                                                                                                                             | Week 7 (post DWM)   | 8.2 (7.6, 8.9)                        | 6.8 (5.9, 7.6)    | 1.5 (0.4, 2.6)  | 8.6 (7.8, 9.4)                     | 7.1 (6.1, 8.1)    | 1.5 (0.5, 2.6)  |
| GAD-7 <sup>3</sup>                                                                                                                                                                                                                                          | Week 21 (follow-up) | 7.3 (6.5, 8.2)                        | 5.2 (4.4, 6)      | 2.2 (0.9, 3.4)  | 7.6 (6.5, 8.6)                     | 5.3 (4.2, 6.4)    | 2.2 (1, 3.5)    |
|                                                                                                                                                                                                                                                             | Week 13 (post PM+)  | 7.9 (6.9, 8.9)                        | 5.2 (4.4, 6)      | 2.7 (1.5, 4)    | 8.1 (7, 9.3)                       | 5.4 (4.2, 6.5)    | 2.8 (1.5, 4.1)  |
|                                                                                                                                                                                                                                                             | Week 7 (post DWM)   | 8.9 (8.3, 9.5)                        | 6.8 (6, 7.6)      | 2.1 (1.1, 3.1)  | 9.1 (8.3, 10)                      | 7 (6, 7.9)        | 2.1 (1.1, 3.2)  |
| PCL-5 <sup>4</sup>                                                                                                                                                                                                                                          | Week 21 (follow-up) | 9.7 (8.3, 11.2)                       | 7 (5.8, 8.1)      | 2.8 (0.9, 4.6)  | 9.8 (8.1, 11.5)                    | 7 (5.4, 8.6)      | 2.8 (1, 4.7)    |
|                                                                                                                                                                                                                                                             | Week 13 (post PM+)  | 9.8 (8.5, 11.1)                       | 7.3 (6.1, 8.4)    | 2.5 (0.8, 4.2)  | 9.9 (8.4, 11.5)                    | 7.3 (5.8, 8.9)    | 2.6 (0.9, 4.3)  |
|                                                                                                                                                                                                                                                             | Week 7 (post DWM)   | 11.1 (10, 12.2)                       | 9.9 (8.8, 10.9)   | 1.3 (-0.3, 2.8) | 11.2 (9.7, 12.6)                   | 9.9 (8.5, 11.4)   | 1.2 (-0.4, 2.8) |
| Note.                                                                                                                                                                                                                                                       |                     |                                       |                   |                 |                                    |                   |                 |
| All models include participant as a random effect. All confidence intervals calculated using robust standard errors.                                                                                                                                        |                     |                                       |                   |                 |                                    |                   |                 |
| PHQ-ADS = Patient Health Questionnaire - Anxiety and Depression Scale; PHQ-9 = 9-item Patient Health Questionnaire; GAD-7 = 7-item Generalised Anxiety Disorder; PCL-5 = PTSD checklist for DSM-5; PM+ = Problem Management Plus; DWM = Doing What Matters. |                     |                                       |                   |                 |                                    |                   |                 |
| <sup>‡</sup> Adjusted for outcome score measured at baseline                                                                                                                                                                                                |                     |                                       |                   |                 |                                    |                   |                 |
| <sup>†</sup> Adjusted for age, level of education, use of mental health services prior to enrolment, outcome score measured at baseline, and site.                                                                                                          |                     |                                       |                   |                 |                                    |                   |                 |
| <sup>1</sup> Ns valid at weeks 21, 13, and 7 are 83, 77, and 88, in the control arm, and 81, 77, and 89, in the intervention arm                                                                                                                            |                     |                                       |                   |                 |                                    |                   |                 |
| <sup>2</sup> Ns valid at weeks 21, 13, and 7 are 83, 78, and 88, in the control arm, and 81, 77, and 89, in the intervention arm                                                                                                                            |                     |                                       |                   |                 |                                    |                   |                 |
| <sup>3</sup> Ns valid at weeks 21, 13, and 7 are 83, 77, and 88, in the control arm, and 81, 77, and 89, in the intervention arm                                                                                                                            |                     |                                       |                   |                 |                                    |                   |                 |
| <sup>4</sup> Ns valid at weeks 21, 13, and 7 are 79, 72, and 85, in the control arm, and 79, 76, and 87, in the intervention arm                                                                                                                            |                     |                                       |                   |                 |                                    |                   |                 |

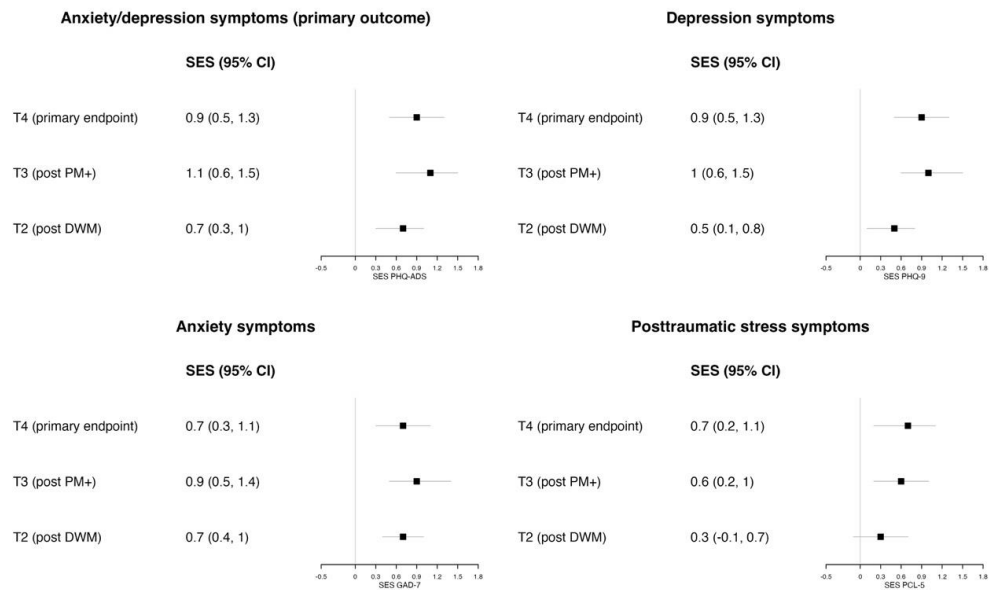

Appendix Figure 2. Standardised effect sizes (female HCWs)

### HCWs involved in the direct care of COVID-19 patients

This analysis includes 107 participants on the intervention arm and 108 participants on the control arm (n = 215, 93%).

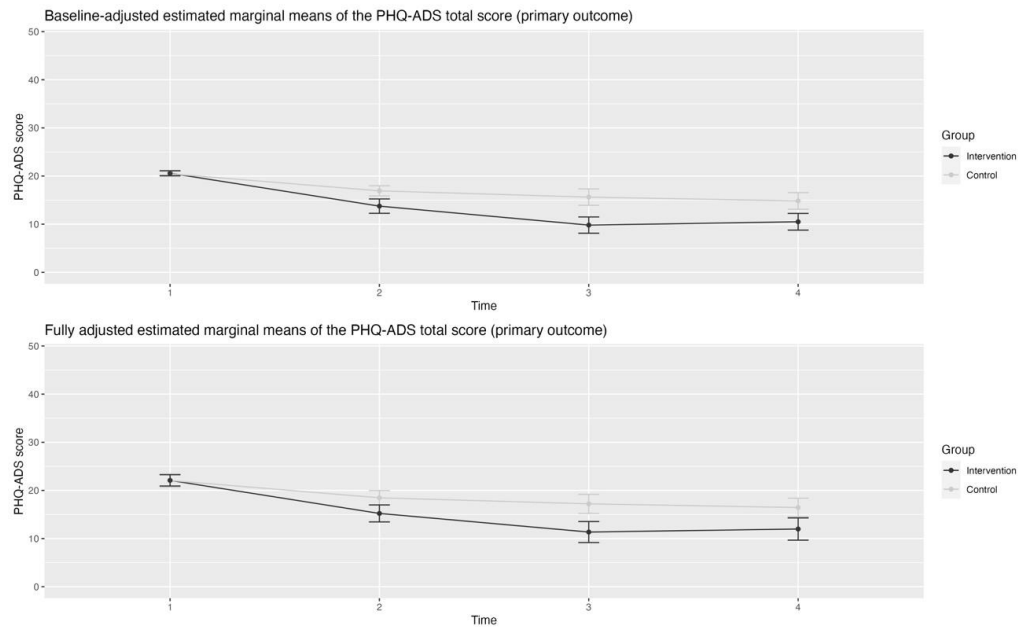

Appendix Figure 3. Estimated marginal means of the PHQ-ADS (frontline HCWs)

Appendix Table 2. Estimated marginal means and 95 percent CIs (frontline HCWs)

|                                                                                                                                                                                                                                                             |                     | Baseline-adjusted models <sup>‡</sup> |                   |                 | Fully adjusted models <sup>†</sup> |                  |                 |
|-------------------------------------------------------------------------------------------------------------------------------------------------------------------------------------------------------------------------------------------------------------|---------------------|---------------------------------------|-------------------|-----------------|------------------------------------|------------------|-----------------|
|                                                                                                                                                                                                                                                             |                     | Control                               | Intervention      | Difference      | Control                            | Intervention     | Difference      |
| PHQ-ADS <sup>1</sup>                                                                                                                                                                                                                                        | Week 21 (follow-up) | 14.8 (13.1, 16.6)                     | 10.5 (8.8, 12.2)  | 4.3 (1.9, 6.8)  | 16.4 (14.5, 18.4)                  | 12 (9.7, 14.3)   | 4.5 (2, 6.9)    |
|                                                                                                                                                                                                                                                             | Week 13 (post PM+)  | 15.6 (13.9, 17.3)                     | 9.8 (8.1, 11.5)   | 5.8 (3.4, 8.2)  | 17.2 (15.2, 19.2)                  | 11.4 (9.2, 13.5) | 5.9 (3.4, 8.3)  |
|                                                                                                                                                                                                                                                             | Week 7 (post DWM)   | 16.9 (15.9, 18)                       | 13.7 (12.3, 15.2) | 3.2 (1.3, 5)    | 18.5 (17, 20)                      | 15.2 (13.5, 17)  | 3.2 (1.4, 5.1)  |
| PHQ-9 <sup>2</sup>                                                                                                                                                                                                                                          | Week 21 (follow-up) | 7.6 (6.7, 8.6)                        | 5.2 (4.2, 6.1)    | 2.5 (1.1, 3.8)  | 8.4 (7.3, 9.4)                     | 5.8 (4.7, 7)     | 2.5 (1.2, 3.9)  |
|                                                                                                                                                                                                                                                             | Week 13 (post PM+)  | 7.9 (6.9, 8.8)                        | 4.7 (3.8, 5.6)    | 3.1 (1.8, 4.4)  | 8.6 (7.6, 9.7)                     | 5.4 (4.4, 6.5)   | 3.2 (1.9, 4.5)  |
|                                                                                                                                                                                                                                                             | Week 7 (post DWM)   | 8.3 (7.7, 8.9)                        | 6.9 (6, 7.7)      | 1.4 (0.4, 2.5)  | 9 (8.2, 9.7)                       | 7.5 (6.6, 8.5)   | 1.4 (0.4, 2.4)  |
| GAD-7 <sup>3</sup>                                                                                                                                                                                                                                          | Week 21 (follow-up) | 7.2 (6.3, 8.1)                        | 5.3 (4.4, 6.2)    | 1.9 (0.6, 3.2)  | 8.1 (7, 9.3)                       | 6.2 (4.9, 7.5)   | 1.9 (0.6, 3.2)  |
|                                                                                                                                                                                                                                                             | Week 13 (post PM+)  | 7.8 (6.8, 8.7)                        | 5.1 (4.2, 6)      | 2.7 (1.4, 3.9)  | 8.7 (7.5, 9.8)                     | 6 (4.7, 7.3)     | 2.7 (1.4, 4)    |
|                                                                                                                                                                                                                                                             | Week 7 (post DWM)   | 8.7 (8.1, 9.3)                        | 6.9 (6.1, 7.7)    | 1.8 (0.8, 2.8)  | 9.6 (8.7, 10.5)                    | 7.7 (6.7, 8.8)   | 1.8 (0.8, 2.8)  |
| PCL-5 <sup>4</sup>                                                                                                                                                                                                                                          | Week 21 (follow-up) | 9.6 (8.2, 11.1)                       | 7.4 (6.1, 8.6)    | 2.3 (0.4, 4.2)  | 9.9 (8, 11.8)                      | 7.6 (5.7, 9.5)   | 2.3 (0.4, 4.3)  |
|                                                                                                                                                                                                                                                             | Week 13 (post PM+)  | 9.9 (8.7, 11.1)                       | 7.6 (6.4, 8.8)    | 2.3 (0.6, 4)    | 10.2 (8.5, 11.9)                   | 7.8 (6, 9.6)     | 2.4 (0.7, 4.1)  |
|                                                                                                                                                                                                                                                             | Week 7 (post DWM)   | 11.3 (10.2, 12.3)                     | 10 (8.9, 11.1)    | 1.3 (-0.3, 2.8) | 11.5 (9.9, 13.1)                   | 10.2 (8.6, 11.9) | 1.2 (-0.3, 2.8) |
| Note.                                                                                                                                                                                                                                                       |                     |                                       |                   |                 |                                    |                  |                 |
| All models include participant as a random effect. All confidence intervals calculated using robust standard errors.                                                                                                                                        |                     |                                       |                   |                 |                                    |                  |                 |
| PHQ-ADS = Patient Health Questionnaire - Anxiety and Depression Scale; PHQ-9 = 9-item Patient Health Questionnaire; GAD-7 = 7-item Generalised Anxiety Disorder; PCL-5 = PTSD checklist for DSM-5; PM+ = Problem Management Plus; DWM = Doing What Matters. |                     |                                       |                   |                 |                                    |                  |                 |
| <sup>‡</sup> Adjusted for outcome score measured at baseline                                                                                                                                                                                                |                     |                                       |                   |                 |                                    |                  |                 |
| <sup>†</sup> Adjusted for age, gender, level of education, use of mental health services prior to enrolment, outcome score measured at baseline, and site.                                                                                                  |                     |                                       |                   |                 |                                    |                  |                 |
| <sup>1</sup> Ns valid at weeks 21, 13, and 7 are 87, 83, and 94, in the control arm, and 83, 79, and 92, in the intervention arm                                                                                                                            |                     |                                       |                   |                 |                                    |                  |                 |
| <sup>2</sup> Ns valid at weeks 21, 13, and 7 are 87, 83, and 94, in the control arm, and 83, 79, and 92, in the intervention arm                                                                                                                            |                     |                                       |                   |                 |                                    |                  |                 |
| <sup>3</sup> Ns valid at weeks 21, 13, and 7 are 87, 83, and 94, in the control arm, and 83, 79, and 92, in the intervention arm                                                                                                                            |                     |                                       |                   |                 |                                    |                  |                 |
| <sup>4</sup> Ns valid at weeks 21, 13, and 7 are 84, 77, and 91, in the control arm, and 81, 78, and 89, in the intervention arm                                                                                                                            |                     |                                       |                   |                 |                                    |                  |                 |

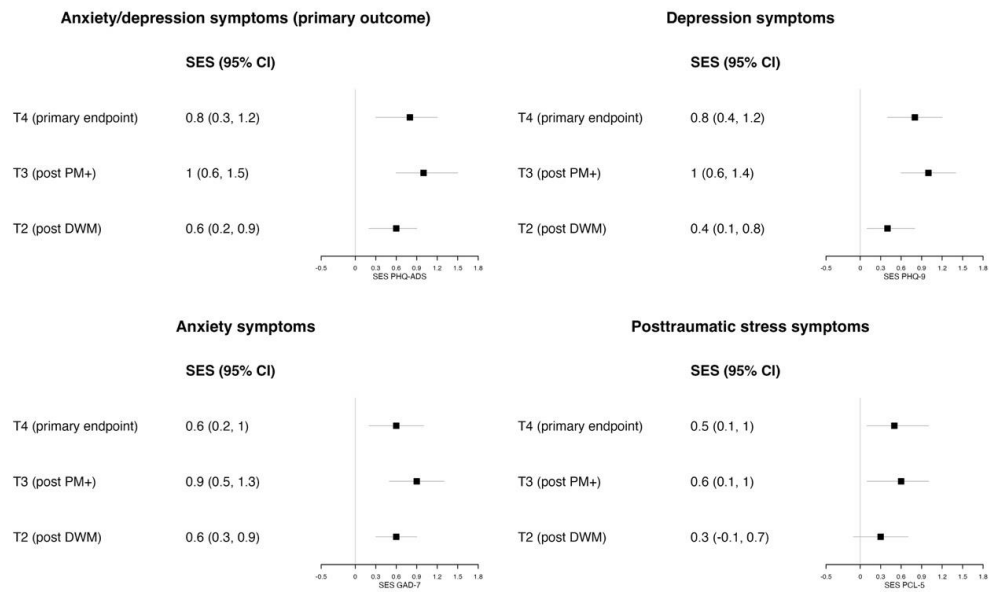

Appendix Figure 4. Standardised effect sizes (frontline HCWs)



### HCWs with probable depression and/or anxiety disorders

This analysis includes 80 participants on the intervention arm and 75 participants on the control arm (n = 155, 67%).

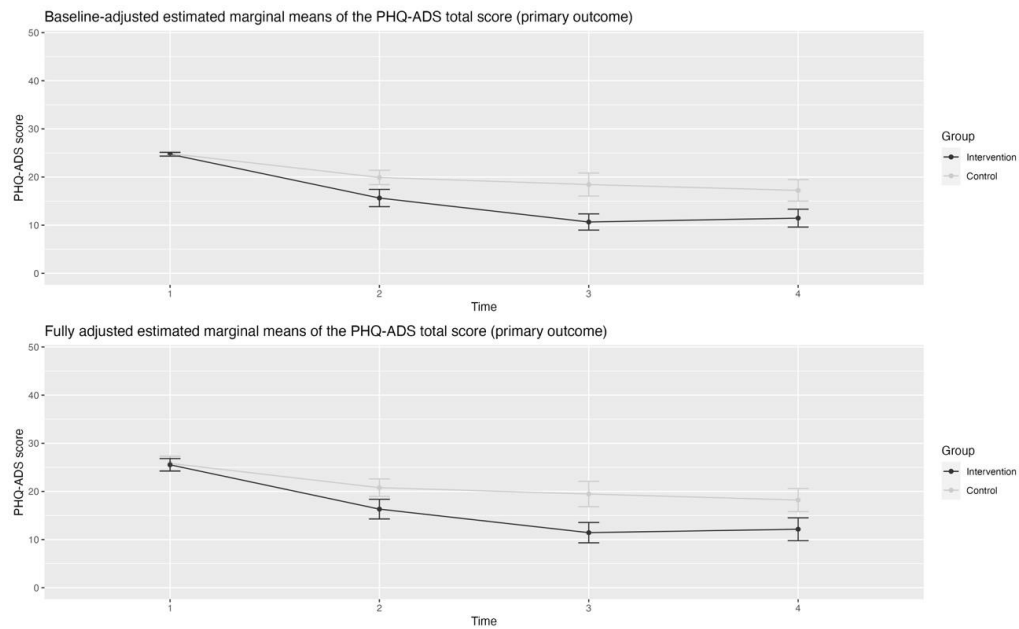

Appendix Figure 5. Estimated marginal means of the PHQ-ADS (HCWs with probable depression and/or anxiety disorders)

Appendix Table 3. Estimated marginal means and 95 percent CIs (HCWs with probable depression and/or anxiety disorders)

|                                                                                                                                                                                                                                                             |                     | Baseline-adjusted models <sup>‡</sup> |                   |                 | Fully adjusted models <sup>†</sup> |                   |                |
|-------------------------------------------------------------------------------------------------------------------------------------------------------------------------------------------------------------------------------------------------------------|---------------------|---------------------------------------|-------------------|-----------------|------------------------------------|-------------------|----------------|
|                                                                                                                                                                                                                                                             |                     | Control                               | Intervention      | Difference      | Control                            | Intervention      | Difference     |
| PHQ-ADS <sup>1</sup>                                                                                                                                                                                                                                        | Week 21 (follow-up) | 17.2 (15, 19.5)                       | 11.5 (9.6, 13.3)  | 5.8 (2.9, 8.7)  | 18.2 (15.8, 20.6)                  | 12.1 (9.8, 14.5)  | 6.1 (3.1, 9)   |
|                                                                                                                                                                                                                                                             | Week 13 (post PM+)  | 18.4 (16, 20.8)                       | 10.7 (9, 12.3)    | 7.8 (4.9, 10.7) | 19.5 (16.8, 22.1)                  | 11.4 (9.3, 13.5)  | 8 (5, 11)      |
|                                                                                                                                                                                                                                                             | Week 7 (post DWM)   | 19.9 (18.4, 21.4)                     | 15.6 (13.8, 17.4) | 4.3 (1.9, 6.6)  | 20.8 (19, 22.6)                    | 16.3 (14.3, 18.4) | 4.5 (2.1, 6.8) |
| PHQ-9 <sup>2</sup>                                                                                                                                                                                                                                          | Week 21 (follow-up) | 9 (7.7, 10.3)                         | 5.7 (4.6, 6.8)    | 3.3 (1.7, 5)    | 9.5 (8.1, 10.9)                    | 6 (4.7, 7.2)      | 3.5 (1.8, 5.2) |
|                                                                                                                                                                                                                                                             | Week 13 (post PM+)  | 9.4 (8, 10.7)                         | 5.2 (4.2, 6.2)    | 4.1 (2.5, 5.8)  | 9.9 (8.4, 11.4)                    | 5.6 (4.5, 6.7)    | 4.3 (2.6, 6)   |
|                                                                                                                                                                                                                                                             | Week 7 (post DWM)   | 9.9 (9, 10.8)                         | 7.9 (6.8, 9)      | 2 (0.6, 3.4)    | 10.2 (9.2, 11.3)                   | 8.2 (7, 9.4)      | 2.1 (0.7, 3.4) |
| GAD-7 <sup>3</sup>                                                                                                                                                                                                                                          | Week 21 (follow-up) | 8.2 (7.1, 9.3)                        | 5.8 (4.8, 6.7)    | 2.5 (1, 3.9)    | 8.8 (7.5, 10.1)                    | 6.2 (4.8, 7.6)    | 2.6 (1.1, 4.1) |
|                                                                                                                                                                                                                                                             | Week 13 (post PM+)  | 9.1 (7.8, 10.3)                       | 5.4 (4.6, 6.2)    | 3.7 (2.2, 5.2)  | 9.7 (8.2, 11.2)                    | 5.9 (4.6, 7.2)    | 3.8 (2.2, 5.3) |
|                                                                                                                                                                                                                                                             | Week 7 (post DWM)   | 10 (9.2, 10.8)                        | 7.7 (6.8, 8.6)    | 2.3 (1.1, 3.5)  | 10.6 (9.5, 11.7)                   | 8.2 (7, 9.4)      | 2.4 (1.2, 3.6) |
| PCL-5 <sup>4</sup>                                                                                                                                                                                                                                          | Week 21 (follow-up) | 11.1 (9.2, 13.1)                      | 8.3 (6.9, 9.8)    | 2.8 (0.4, 5.2)  | 11.5 (9, 14.1)                     | 8.6 (6.4, 10.9)   | 2.9 (0.4, 5.4) |
|                                                                                                                                                                                                                                                             | Week 13 (post PM+)  | 12 (10.4, 13.6)                       | 8.1 (6.7, 9.6)    | 3.9 (1.7, 6)    | 12.5 (10.3, 14.6)                  | 8.4 (6.3, 10.6)   | 4 (1.8, 6.2)   |
|                                                                                                                                                                                                                                                             | Week 7 (post DWM)   | 13.2 (11.7, 14.8)                     | 11.2 (10, 12.5)   | 2 (0, 4)        | 13.5 (11.4, 15.7)                  | 11.6 (9.7, 13.5)  | 2 (-0.1, 4)    |
| Note.                                                                                                                                                                                                                                                       |                     |                                       |                   |                 |                                    |                   |                |
| All models include participant as a random effect. All confidence intervals calculated using robust standard errors.                                                                                                                                        |                     |                                       |                   |                 |                                    |                   |                |
| PHQ-ADS = Patient Health Questionnaire - Anxiety and Depression Scale; PHQ-9 = 9-item Patient Health Questionnaire; GAD-7 = 7-item Generalised Anxiety Disorder; PCL-5 = PTSD checklist for DSM-5; PM+ = Problem Management Plus; DWM = Doing What Matters. |                     |                                       |                   |                 |                                    |                   |                |
| <sup>‡</sup> Adjusted for outcome score measured at baseline                                                                                                                                                                                                |                     |                                       |                   |                 |                                    |                   |                |
| <sup>†</sup> Adjusted for age, gender, level of education, use of mental health services prior to enrolment, outcome score measured at baseline, and site.                                                                                                  |                     |                                       |                   |                 |                                    |                   |                |
| <sup>1</sup> Ns valid at weeks 21, 13, and 7 are 60, 55, and 65, in the control arm, and 62, 60, and 69, in the intervention arm                                                                                                                            |                     |                                       |                   |                 |                                    |                   |                |
| <sup>2</sup> Ns valid at weeks 21, 13, and 7 are 60, 55, and 65, in the control arm, and 62, 60, and 69, in the intervention arm                                                                                                                            |                     |                                       |                   |                 |                                    |                   |                |
| <sup>3</sup> Ns valid at weeks 21, 13, and 7 are 60, 55, and 65, in the control arm, and 62, 60, and 69, in the intervention arm                                                                                                                            |                     |                                       |                   |                 |                                    |                   |                |
| <sup>4</sup> Ns valid at weeks 21, 13, and 7 are 56, 52, and 63, in the control arm, and 61, 59, and 67, in the intervention arm                                                                                                                            |                     |                                       |                   |                 |                                    |                   |                |

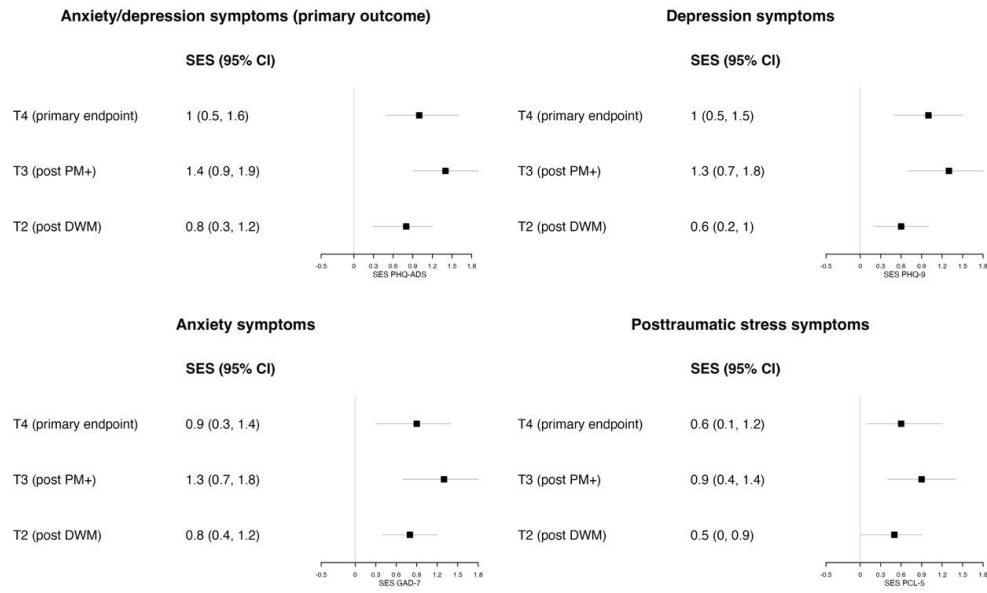

Appendix Figure 6. Standardised effect sizes (HCWs with probable depression and/or anxiety disorders)

### Sensitivity analyses (exploratory)

We ran three exploratory analyses on our primary and secondary outcomes that were not specified in the study protocol: a complete-case analysis, a modified per-protocol analysis, and a binary logistic regression analysis. The results are presented below.

#### Complete-case analysis

The complete-case analysis includes all participants reporting the primary outcome measure at all time points, i.e., 79 participants on the intervention arm and 70 participants on the control arm (n = 149, 64%).

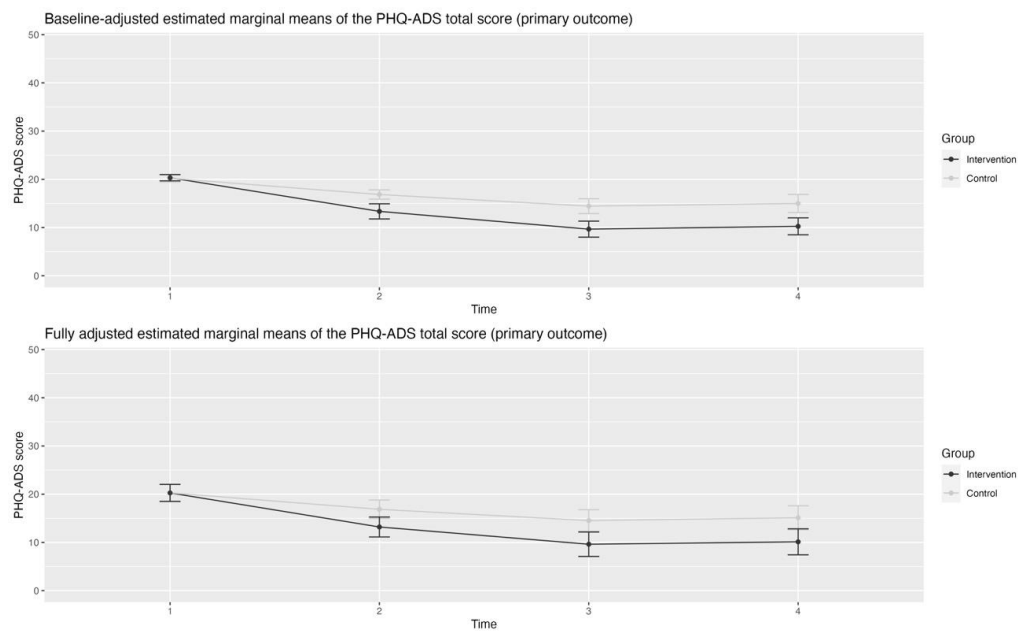

Appendix Figure 7. Estimated marginal means of the PHQ-ADS (complete-case analysis)

Appendix Table 4. Estimated marginal means and 95 percent CIs (complete-case analysis)

|                                                                                                                                                                                                                                                             |                     | Baseline-adjusted models <sup>‡</sup> |                   |                | Fully adjusted models <sup>†</sup> |                   |                |
|-------------------------------------------------------------------------------------------------------------------------------------------------------------------------------------------------------------------------------------------------------------|---------------------|---------------------------------------|-------------------|----------------|------------------------------------|-------------------|----------------|
|                                                                                                                                                                                                                                                             |                     | Control                               | Intervention      | Difference     | Control                            | Intervention      | Difference     |
| PHQ-ADS <sup>1</sup>                                                                                                                                                                                                                                        | Week 21 (follow-up) | 15 (13.1, 16.9)                       | 10.2 (8.5, 12)    | 4.7 (2.2, 7.3) | 15.1 (12.6, 17.6)                  | 10.1 (7.4, 12.8)  | 5 (2.4, 7.6)   |
|                                                                                                                                                                                                                                                             | Week 13 (post PM+)  | 14.4 (12.9, 16)                       | 9.7 (8, 11.3)     | 4.8 (2.5, 7)   | 14.5 (12.3, 16.8)                  | 9.6 (7.1, 12.2)   | 4.9 (2.6, 7.2) |
|                                                                                                                                                                                                                                                             | Week 7 (post DWM)   | 16.8 (15.9, 17.8)                     | 13.4 (11.8, 14.9) | 3.5 (1.7, 5.3) | 16.9 (15, 18.8)                    | 13.2 (11.1, 15.3) | 3.7 (1.9, 5.4) |
| PHQ-9 <sup>2</sup>                                                                                                                                                                                                                                          | Week 21 (follow-up) | 7.5 (6.5, 8.5)                        | 5 (4, 5.9)        | 2.5 (1.1, 3.9) | 7.8 (6.5, 9.2)                     | 5.2 (3.9, 6.4)    | 2.7 (1.2, 4.1) |
|                                                                                                                                                                                                                                                             | Week 13 (post PM+)  | 7.1 (6.2, 7.9)                        | 4.6 (3.7, 5.5)    | 2.5 (1.3, 3.7) | 7.4 (6.2, 8.6)                     | 4.8 (3.7, 6)      | 2.6 (1.3, 3.8) |
|                                                                                                                                                                                                                                                             | Week 7 (post DWM)   | 8.1 (7.6, 8.7)                        | 6.6 (5.7, 7.5)    | 1.5 (0.5, 2.6) | 8.4 (7.4, 9.4)                     | 6.8 (5.7, 7.9)    | 1.6 (0.6, 2.6) |
| GAD-7 <sup>3</sup>                                                                                                                                                                                                                                          | Week 21 (follow-up) | 7.5 (6.5, 8.4)                        | 5.3 (4.3, 6.2)    | 2.2 (0.9, 3.5) | 7.3 (5.9, 8.7)                     | 4.9 (3.4, 6.5)    | 2.3 (1, 3.7)   |
|                                                                                                                                                                                                                                                             | Week 13 (post PM+)  | 7.4 (6.5, 8.3)                        | 5.1 (4.2, 5.9)    | 2.3 (1, 3.5)   | 7.1 (5.8, 8.4)                     | 4.8 (3.3, 6.3)    | 2.4 (1.1, 3.6) |
|                                                                                                                                                                                                                                                             | Week 7 (post DWM)   | 8.7 (8.1, 9.3)                        | 6.8 (5.9, 7.6)    | 1.9 (0.9, 3)   | 8.5 (7.4, 9.6)                     | 6.4 (5.2, 7.6)    | 2.1 (1, 3.1)   |
| PCL-5 <sup>4</sup>                                                                                                                                                                                                                                          | Week 21 (follow-up) | 9.5 (8, 11.1)                         | 7.1 (5.8, 8.3)    | 2.4 (0.5, 4.4) | 9.8 (7.9, 11.8)                    | 7.2 (5.3, 9.2)    | 2.6 (0.6, 4.6) |
|                                                                                                                                                                                                                                                             | Week 13 (post PM+)  | 9.2 (8, 10.4)                         | 7.3 (6.2, 8.4)    | 1.9 (0.3, 3.6) | 9.6 (7.9, 11.2)                    | 7.4 (5.7, 9.2)    | 2.1 (0.4, 3.8) |
|                                                                                                                                                                                                                                                             | Week 7 (post DWM)   | 11.4 (10.2, 12.7)                     | 10.1 (9, 11.3)    | 1.3 (-0.4, 3)  | 11.7 (9.9, 13.5)                   | 10.3 (8.7, 12)    | 1.4 (-0.3, 3)  |
| Note.                                                                                                                                                                                                                                                       |                     |                                       |                   |                |                                    |                   |                |
| All models include participant as a random effect. All confidence intervals calculated using robust standard errors.                                                                                                                                        |                     |                                       |                   |                |                                    |                   |                |
| PHQ-ADS = Patient Health Questionnaire - Anxiety and Depression Scale; PHQ-9 = 9-item Patient Health Questionnaire; GAD-7 = 7-item Generalised Anxiety Disorder; PCL-5 = PTSD checklist for DSM-5; PM+ = Problem Management Plus; DWM = Doing What Matters. |                     |                                       |                   |                |                                    |                   |                |
| <sup>‡</sup> Adjusted for outcome score measured at baseline                                                                                                                                                                                                |                     |                                       |                   |                |                                    |                   |                |
| <sup>†</sup> Adjusted for age, gender, level of education, use of mental health services prior to enrolment, outcome score measured at baseline, and site.                                                                                                  |                     |                                       |                   |                |                                    |                   |                |
| <sup>1</sup> Ns valid at weeks 21, 13, and 7 are 70, 70, and 70, in the control arm, and 79, 79, and 79, in the intervention arm                                                                                                                            |                     |                                       |                   |                |                                    |                   |                |
| <sup>2</sup> Ns valid at weeks 21, 13, and 7 are 70, 70, and 70, in the control arm, and 79, 79, and 79, in the intervention arm                                                                                                                            |                     |                                       |                   |                |                                    |                   |                |
| <sup>3</sup> Ns valid at weeks 21, 13, and 7 are 70, 70, and 70, in the control arm, and 79, 79, and 79, in the intervention arm                                                                                                                            |                     |                                       |                   |                |                                    |                   |                |
| <sup>4</sup> Ns valid at weeks 21, 13, and 7 are 70, 70, and 70, in the control arm, and 79, 79, and 79, in the intervention arm                                                                                                                            |                     |                                       |                   |                |                                    |                   |                |

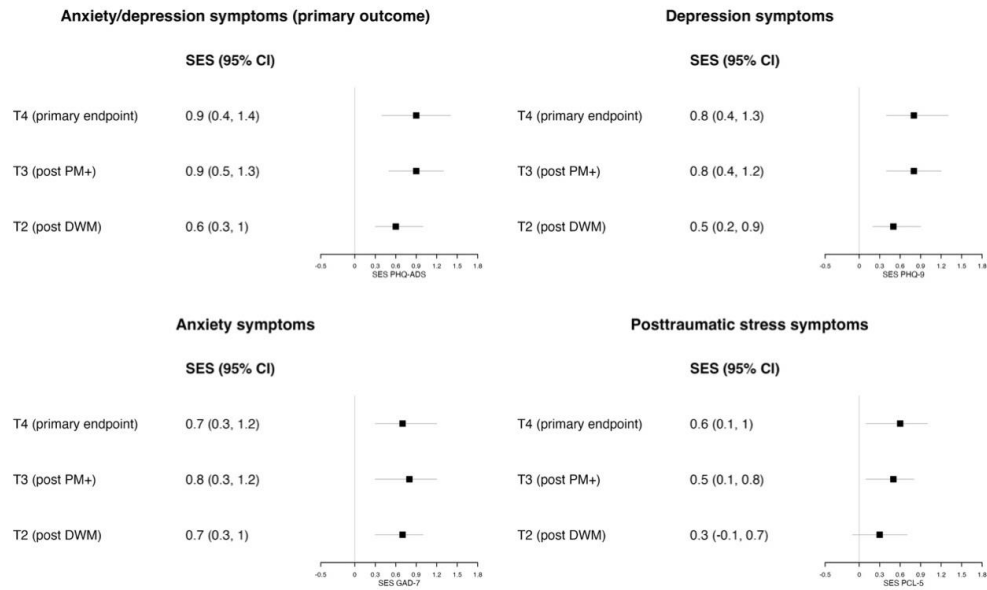

Appendix Figure 8. Standardised effect sizes (complete-case analysis)

### Per-protocol analysis

The modified per-protocol analysis includes all participants in the control arm (117) and all participants who completed the intervention programme (n = 73, 64%). Completers were participants who stepped up and finished both DWM (i.e., clicked through at least three modules) and PM+ (i.e., attended at least four sessions) and participants who did not step up and finished DWM.

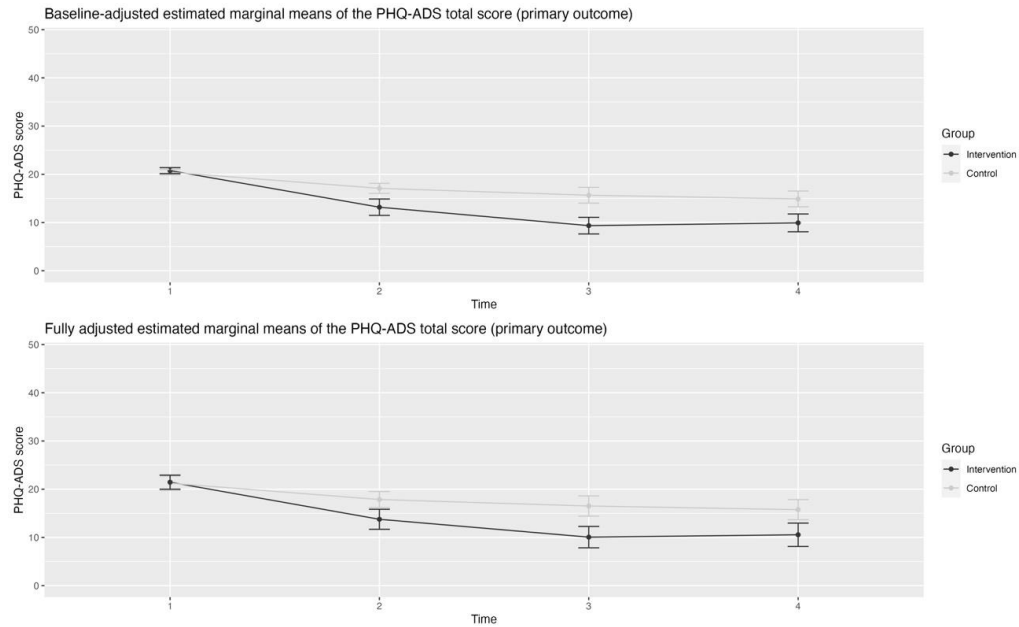

Appendix Figure 9. Estimated marginal means of the PHQ-ADS (per-protocol analysis)

Appendix Table 5. Estimated marginal means and 95 percent CIs (per-protocol analysis)

|                                                                                                                                                                                                                                                             |                     | Baseline-adjusted models <sup>‡</sup> |                   |                 | Fully adjusted models <sup>†</sup> |                   |                 |
|-------------------------------------------------------------------------------------------------------------------------------------------------------------------------------------------------------------------------------------------------------------|---------------------|---------------------------------------|-------------------|-----------------|------------------------------------|-------------------|-----------------|
|                                                                                                                                                                                                                                                             |                     | Control                               | Intervention      | Difference      | Control                            | Intervention      | Difference      |
| PHQ-ADS <sup>1</sup>                                                                                                                                                                                                                                        | Week 21 (follow-up) | 14.9 (13.3, 16.5)                     | 9.9 (8.1, 11.8)   | 5 (2.5, 7.5)    | 15.8 (13.7, 17.8)                  | 10.5 (8.1, 13)    | 5.2 (2.7, 7.7)  |
|                                                                                                                                                                                                                                                             | Week 13 (post PM+)  | 15.7 (14, 17.3)                       | 9.4 (7.6, 11.1)   | 6.3 (3.9, 8.7)  | 16.5 (14.4, 18.6)                  | 10.1 (7.8, 12.3)  | 6.5 (4, 8.9)    |
|                                                                                                                                                                                                                                                             | Week 7 (post DWM)   | 17.1 (16, 18.1)                       | 13.2 (11.5, 14.9) | 3.9 (1.9, 5.9)  | 17.9 (16.2, 19.5)                  | 13.8 (11.7, 15.8) | 4.1 (2.1, 6.1)  |
| PHQ-9 <sup>2</sup>                                                                                                                                                                                                                                          | Week 21 (follow-up) | 7.6 (6.7, 8.5)                        | 4.6 (3.6, 5.6)    | 3 (1.7, 4.4)    | 8.2 (7.1, 9.3)                     | 5 (3.8, 6.3)      | 3.1 (1.8, 4.5)  |
|                                                                                                                                                                                                                                                             | Week 13 (post PM+)  | 7.9 (7, 8.8)                          | 4.4 (3.5, 5.3)    | 3.5 (2.2, 4.8)  | 8.5 (7.3, 9.6)                     | 4.9 (3.8, 6)      | 3.6 (2.3, 4.9)  |
|                                                                                                                                                                                                                                                             | Week 7 (post DWM)   | 8.4 (7.8, 9)                          | 6.5 (5.5, 7.4)    | 1.9 (0.8, 3)    | 8.9 (8, 9.8)                       | 6.9 (5.7, 8)      | 2 (0.9, 3.1)    |
| GAD-7 <sup>3</sup>                                                                                                                                                                                                                                          | Week 21 (follow-up) | 7.3 (6.4, 8.1)                        | 5.3 (4.4, 6.3)    | 1.9 (0.6, 3.2)  | 7.6 (6.4, 8.7)                     | 5.5 (4.2, 6.8)    | 2.1 (0.7, 3.4)  |
|                                                                                                                                                                                                                                                             | Week 13 (post PM+)  | 7.7 (6.9, 8.6)                        | 5 (4.1, 5.8)      | 2.8 (1.5, 4)    | 8 (6.9, 9.2)                       | 5.2 (4, 6.4)      | 2.8 (1.6, 4.1)  |
|                                                                                                                                                                                                                                                             | Week 7 (post DWM)   | 8.7 (8.1, 9.3)                        | 6.7 (5.8, 7.6)    | 2 (0.9, 3.1)    | 9 (8.1, 9.9)                       | 6.9 (5.8, 8)      | 2.1 (1, 3.2)    |
| PCL-5 <sup>4</sup>                                                                                                                                                                                                                                          | Week 21 (follow-up) | 9.6 (8.2, 11)                         | 7.3 (6, 8.6)      | 2.3 (0.4, 4.2)  | 10.2 (8.4, 12)                     | 7.7 (5.8, 9.5)    | 2.5 (0.6, 4.4)  |
|                                                                                                                                                                                                                                                             | Week 13 (post PM+)  | 9.8 (8.6, 10.9)                       | 7.5 (6.2, 8.7)    | 2.3 (0.6, 4)    | 10.4 (8.7, 12)                     | 7.9 (6.1, 9.6)    | 2.5 (0.8, 4.2)  |
|                                                                                                                                                                                                                                                             | Week 7 (post DWM)   | 11 (10, 12.1)                         | 10.3 (9, 11.5)    | 0.8 (-0.9, 2.4) | 11.6 (10, 13.2)                    | 10.7 (9, 12.5)    | 0.9 (-0.8, 2.6) |
| Note.                                                                                                                                                                                                                                                       |                     |                                       |                   |                 |                                    |                   |                 |
| All models include participant as a random effect. All confidence intervals calculated using robust standard errors.                                                                                                                                        |                     |                                       |                   |                 |                                    |                   |                 |
| PHQ-ADS = Patient Health Questionnaire - Anxiety and Depression Scale; PHQ-9 = 9-item Patient Health Questionnaire; GAD-7 = 7-item Generalised Anxiety Disorder; PCL-5 = PTSD checklist for DSM-5; PM+ = Problem Management Plus; DWM = Doing What Matters. |                     |                                       |                   |                 |                                    |                   |                 |
| <sup>‡</sup> Adjusted for outcome score measured at baseline                                                                                                                                                                                                |                     |                                       |                   |                 |                                    |                   |                 |
| <sup>†</sup> Adjusted for age, gender, level of education, use of mental health services prior to enrolment, outcome score measured at baseline, and site.                                                                                                  |                     |                                       |                   |                 |                                    |                   |                 |
| <sup>1</sup> Ns valid at weeks 21, 13, and 7 are 94, 88, and 102, in the control arm, and 71, 72, and 73, in the intervention arm                                                                                                                           |                     |                                       |                   |                 |                                    |                   |                 |
| <sup>2</sup> Ns valid at weeks 21, 13, and 7 are 94, 89, and 102, in the control arm, and 71, 72, and 73, in the intervention arm                                                                                                                           |                     |                                       |                   |                 |                                    |                   |                 |
| <sup>3</sup> Ns valid at weeks 21, 13, and 7 are 94, 88, and 102, in the control arm, and 71, 72, and 73, in the intervention arm                                                                                                                           |                     |                                       |                   |                 |                                    |                   |                 |
| <sup>4</sup> Ns valid at weeks 21, 13, and 7 are 90, 82, and 99, in the control arm, and 70, 71, and 70, in the intervention arm                                                                                                                            |                     |                                       |                   |                 |                                    |                   |                 |



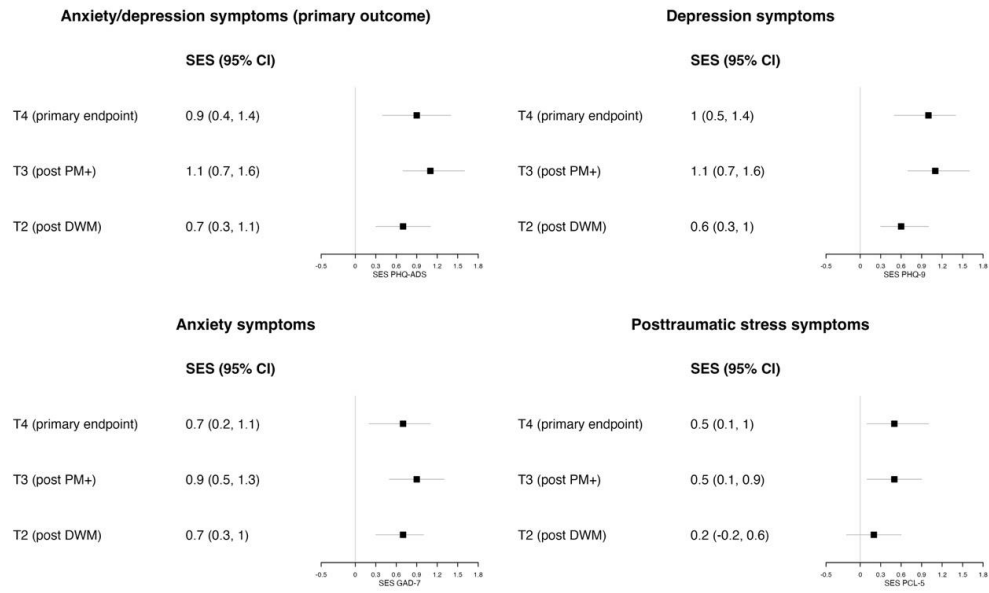

Appendix Figure 10. Standardised effect sizes (per-protocol analysis)

### Binary logistic regression models

Binary logistic regression analyses include the full ITT sample.

Appendix Table 6. Estimates and 95 percent CIs for baseline- and fully adjusted intention-to-treat models

|                        | PHQ-ADS <sup>y</sup> | PHQ-ADS <sup>†</sup> | PHQ-9 <sup>y</sup> | PHQ-9 <sup>†</sup> | GAD-7 <sup>y</sup> | GAD-7 <sup>†</sup> |
|------------------------|----------------------|----------------------|--------------------|--------------------|--------------------|--------------------|
| Intervention at time 2 | 5.13                 | 5.47                 | 6.30               | 6.40               | 2.79               | 3.22               |
|                        | [1.76, 14.97]        | [1.90, 15.71]        | [2.01, 19.70]      | [2.07, 19.76]      | [0.94, 8.27]       | [1.08, 9.60]       |
| Intervention at time 3 | 11.10                | 10.93                | 10.68              | 9.98               | 7.82               | 8.24               |
|                        | [3.27, 37.69]        | [3.25, 36.78]        | [2.93, 38.90]      | [2.76, 36.06]      | [2.04, 30.01]      | [2.14, 31.75]      |
| Intervention at time 4 | 4.48                 | 4.91                 | 8.34               | 9.02               | 2.73               | 3.24               |
|                        | [1.43, 14.03]        | [1.57, 15.35]        | [2.41, 28.85]      | [2.58, 31.49]      | [0.84, 8.85]       | [0.99, 10.66]      |

Note.

All models include participant as a random effect. All confidence intervals calculated using robust standard errors.  
 PHQ-ADS = Patient Health Questionnaire - Anxiety and Depression Scale; PHQ-9 = 9-item Patient Health Questionnaire; GAD-7 = 7-item Generalised Anxiety Disorder; PCL-5 = PTSD checklist for DSM-5; PM+ = Problem Management Plus; DWM = Doing What Matters.  
<sup>y</sup>Adjusted for outcome score measured at baseline  
<sup>†</sup>Adjusted for age, gender, level of education, use of mental health services prior to enrolment, outcome score measured at baseline, and site.

Using Agresti's generalised odds ratios (R package *genodds*) we obtained the following NNT estimates:

Appendix Table 7. NNT and 95 percent CIs

|                                   | PHQ-ADS     | PHQ-9       | GAD-7       |
|-----------------------------------|-------------|-------------|-------------|
| Week 21 ( <i>t</i> <sub>4</sub> ) | 6 (3 to 24) | 6 (4 to 27) | 6 (4 to 24) |
| Week 13 ( <i>t</i> <sub>3</sub> ) | 4 (3 to 8)  | 7 (4 to 27) | 4 (3 to 9)  |
| Week 7 ( <i>t</i> <sub>2</sub> )  | 5 (3 to 14) | 7 (4 to 50) | 5 (3 to 14) |
